# Supplementary material for: Delivering genes across the blood-brain barrier: LY6A, a novel cellular receptor for AAV-PHP.B capsids
Source: PLOS journal article supplement (doi:10.1371/journal.pone.0225206), 2019-11-14
Supplement: S3 (10.1371/journal.pone.0225206.s003) [file journal.pone.0225206.s003]

**S3 Table. Permissive or nonpermissive AAV-PHP.eB CNS transduction phenotypes for inbred mouse lines with available WGS data.**

| <b>Strain</b>            | <b>Enhanced CNS tropism</b>  | <b>References</b> |
|--------------------------|------------------------------|-------------------|
| <b>AKR/J</b>             | Present                      | This study        |
| <b>BTBR/T+/Itpr3tf/J</b> | Present                      | Predicted         |
| <b>C57BL/6J</b>          | Present, previously reported | [4–7]             |
| <b>C57BL/6NJ</b>         | Present, previously reported | [8]               |
| <b>C57BL/10J</b>         | Present                      | Predicted         |
| <b>C57BR/cdJ</b>         | Present                      | Predicted         |
| <b>C57L/J</b>            | Present                      | This study        |
| <b>C58/J</b>             | Present                      | Predicted         |
| <b>DBA/1J</b>            | Present                      | Predicted         |
| <b>DBA/2J</b>            | Present                      | This study        |
| <b>FVB/NJ</b>            | Present                      | This study        |
| <b>I/LnJ</b>             | Present                      | Predicted         |
| <b>KK/HiJ</b>            | Present                      | Predicted         |
| <b>LP/J</b>              | Present                      | This study        |
| <b>NZW/LacJ</b>          | Present                      | Predicted         |
| <b>RF/J</b>              | Present                      | Predicted         |
| <b>MOLF/EiJ</b>          | Present                      | This study        |
| <b>129P2/OlaHsd</b>      | Present                      | Predicted         |
| <b>129S1/SvImJ</b>       | Present                      | Predicted         |
| <b>129S5SvEvBrd</b>      | Present                      | Predicted         |
| <b>A/J</b>               | Absent                       | Predicted         |
| <b>BALB/cJ</b>           | Absent, previously reported  | [9]; this study   |
| <b>BUB/BnJ</b>           | Absent                       | Predicted         |
| <b>CAST/EiJ</b>          | Absent                       | This study        |
| <b>CBA/J</b>             | Absent                       | This study        |
| <b>C3H/HeH</b>           | Absent                       | Predicted         |
| <b>C3H/HeJ</b>           | Absent                       | Predicted         |
| <b>LEWES/EiJ</b>         | Absent                       | Predicted         |
| <b>NOD/ShiLtJ</b>        | Absent                       | This study        |
| <b>NZB/B1NJ</b>          | Absent                       | This study        |
| <b>NZO/HILtJ</b>         | Absent                       | Predicted         |
| <b>PWK/PhJ</b>           | Absent                       | This study        |
| <b>SEA/GnJ</b>           | Absent                       | Predicted         |
| <b>SPRET/EiJ</b>         | Absent                       | Predicted         |
| <b>SEA/GnJ</b>           | Absent                       | Predicted         |
| <b>ST/bJ</b>             | Absent                       | Predicted         |
| <b>WSB/EiJ</b>           | Absent                       | Predicted         |
| <b>ZALENDE/EiJ</b>       | Absent                       | Predicted         |

The lines highlighted in bolded text were used in the analysis presented in Fig 1D.
