# Supplementary material for: Delivering genes across the blood-brain barrier: LY6A, a novel cellular receptor for AAV-PHP.B capsids
Source: PLoS One. 2019 Nov 14;14(11):e0225206. doi: 10.1371/journal.pone.0225206 (PMC6855452; doi:10.1371/journal.pone.0225206)
Supplement: S4 File — (XLSX) [file pone.0225206.s011.xlsx]

## Sheet: Sheet1
	Figure 1C
			AAV9						AAV-PHP.eB
	Brain	C57	1.44	0.4	0.07	0.71	0.11	0.13	257.88	487.66	87.97	84.17	90.93	1.18
		BALB/c	0.42	0.1	0.24	0.04	0.12	0.39	0.1	0.42	0.3	0.79	0.02	0.01
	SC	C57	1.77	0.26	0.35	0.37	0.41	0.63	294.79	1726.7	508.59	384.17	192.43	3
		BALB/c	0.75	0.47	0.46	0.27	0.65	0.42	0.53	0.18	0.18	0.29	0.2	0.01
	Kidney	C57	6.09	2.68	1.22	2.32	0.67	1.78	5.89	14.03	6.19	9.66	4.93	0.75
		BALB/c	1.84	4.18	2.65	1.46	3.26	1.49	12.1	2.97	4.56	3.9	9.1	1.46
	Speen	C57	62.28	61.09	26.89	50.86	23.94	15.24	69.6	48.1	133.91	150.3	73.92	37.17
		BALB/c	27.58	43.78	21.45	6.41	14.71	4.95	66.75	31.09	29.19	43.79	74.52	25.14
	Lung	C57	3.63	1.13	0.85	0.85	0.36	2.54	11.96	25.17	12.9	13.92	12.08	0.29
		BALB/c	1.19	2.26	1.88	0.85	0.49	2.9	1.2	1.04	0.49	1.22	0.74	0.53
	Liver	C57	38.3	29.13	16.22	8.64	17.5	6.99	12.17	6.34	5.63	44.18	23.38	29.53
		BALB/c	20.73	46.22	25.74	14.03	28.19	12.41	55.98	23.02	7.48	19.94	25.7	15.62
	Heart	C57	0.29	0.83	1.23	0.26	0.57	0.43	0.16	0.07	0.15	0.1	0.12	3.98
		BALB/c	0.4	0.49	0.32	2.07	0.44	1.19	1.39	8.77	5	2.89	2.2	6.94
	Serum	C57	1000000000	230000000	1100000000	980000000	440000000	120000000	95000000	240000000	230000000	170000000	570000000	240000000
		BALB/c	37000000	400000000	24000000	140000000	1100000	79000000	89000000	290000000	520000000	320000000	160000000	210000000
	Figure ID
			High+Medium median	95th percentile	5th Percentile	High median	95th percentile	5th Percentile
		3	8206	12948	3690.3	145	225	67
		4	3851.5	8004	1062.05	70	145	5
		5	1878	5230.85	180.35	32	96.05	2
		6	893	3577.8	100.8	15	71	1
		7	412.5	2389.05	17.85	7	45	0
		8	167.5	1640.95	4.95	3	25.05	0
		9	75	1253.85	1.95	1	22.05	0
		10	40	775.8	0	0	11	0
		11	12	491.2	0	0	10.05	0
		12	5	398.95	0	0	6	0
	Figure 1G
			Ly6a			Ly6c1			Pecam1 (CD31)
		Endothelial	261.46	16.3		1001.1	28.304		311.49	3.82
		Astrocytes	1.23	0.213		3.55	0.93		2.14	0.08
		Neurons	0.312	0.0036		1.576	0.337		1.52	0.001
		OPC	1.41	1.05		3.31	1.97		1.05	0.42
		Myelinating OLs	1.78	0.43		2.3024	0.2608		0.1936	0.01
		Microglia	4.768	2.5		10.18	7.92		8.492	0.41
	Figure 3A
			AAV9			PHP.eB			PHP.B			PHP.B2			PHP.B3
		–	0.81	1.11	1.11	0.63	0.76	0.89	0.71	0.85	0.95	1.16	1.42	1.45	0.59	0.82	0.81
		Ly6a	0.44	0.66	0.67	23.84	50.03	55.76	108.56	91.84	106.71	103.09	94	90.89	37.04	34.31	40.51
		Ly6c1	1.25	1.16	1.24	1.77	1.68	2.2	1.29	1.26	1.2	0.97	1.03	0.99	0.72	0.93	0.82
	Figure 3B
			AAV9 1x103			PHP.eB 1x103			AAV9 1x104			AAV-PHP.eB 1x104
		–	1.2	0.88	0.88	0.95	0.51	0.79	11	11	10	9.4	8.9	8.3
		Ly6a	0.95	0.79	1.2	21	23	40	9.7	11	12	170	180	200
		Ly6c1	0.99	1	1.1	0.45	0.6	0.67	12	12	12	7.8	8.8	8.9
	Figure 3D-E
	Binding	AAV9	0.8	0.92	1.37
		PHP.eB	32.64	34.72	34.1
	Transduction	AAV9	2390	2570	3320
		PHP.eB	1482570	1329730	1.40592e+06
	Figure 3F-G
			AAV9			AAV-PHP.eB
	3F	Ly6a	1.13333	1.16667	1.5	0.572282	0.498292	0.454877
		Ly6c1	1.43333	1	1.3	1.15532	1.02897	0.986926
	3G	Ly6a				0.48	0.3	0.6675
		Ly6c1				0.9475	0.9675	1.0275
	Figure 3H
			Ly6C		Ly6A (E13)		Ly6A (D7)
		5	280000	650000	290000	260000	330000	410000
		50	320000	480000	33000	22000	75000	77000
		500	290000	360000	560	1100	980	1700
	Figure 3I
			LY6A (E13)			LY6A (D7)			LY6C
	Ly6a transfected	5	8820780	9561020	7736850	7625440	7379570	7268910	7692700	8420880	6160640
		50	6266020	12494940	9811000	7740450	5387040	8706040	10061380	8984700	7388350
		500	1988920	4527230	1901980	5190070	5004680	4396590	8752180	8274220	5181540
		5000	591110	957390	535940	620050	668370	317670	6872770	7513280	7808520
	mock transfected	5	322030	414390	416660	634550	526150	650200	454880	611270	499360
		50	354990	749810	436590	491790	600660	503980	488750	674940	880810
		500	281210	535530	496360	400460	492520	539890	261810	414710	593670
		5000	669070	437560	540910	540200	438090	664490	316610	512600	587540
	Supplementary Figure 3
			AAV9
		–	1	1
	Ly6a gRNA	A1	1.7	1
		A2	1.6	0.9
		A3	2.6	1
	Ly6c1 gRNA	C1	2.4	0.9
		C2	1.2	1
		C3	2.1	1.1
	Figure 4A
			Pro5			Lec2			Lec8
		–	1.07	1.07	0.97	15.2	23.3	9.33	0.17	0.37	0.23
		Ly6a	1.5	1	1.77	23.4	40.5	16.33	0.2	0.3	0.17
		–	0.7	2.07	0.67	9.13	24.37	7.43	0.23	0.27	0.2
		Ly6a	15.13	21.43	16.47	17.1	52.93	18.3	10.17	24.97	18.57
	Figure 4B
			Pro5			Lec2			Lec8
		–	1	1	1	3.656	3.106	4.358	1.24	1.286	1.488
		Ly6a	1.086	0.903	0.836	3.668	2.664	3.635	1.052	0.859	0.89
		–	0.548	0.409	0.468	2.422	2.233	2.462	0.647	0.675	0.657
		Ly6a	23.672	18.318	18.717	42.131	39.479	51.208	51.047	46.63	52.256
	Figure 4E
			AAV-PHP.eB
		AAVR KO	143.333	124.467
		WT	197.333	89.2333
